# Supplementary material for: Markers of disease activity in COPD: an 8-year mortality study in the ECLIPSE cohort
Source: PubMed Central journal article supplement — Eur Respir J. 2021 Mar 25;57(3):2001339. doi: 10.1183/13993003.01339-2020 (PMC7991608; doi:10.1183/13993003.01339-2020), 2021-03-25
Supplement: ERJ-01339-2020.Shareable.pdf [file ERJ-01339-2020.Shareable.pdf]

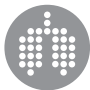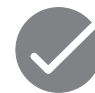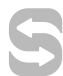

SHAREABLE PDF

# Markers of disease activity in COPD: an 8-year mortality study in the ECLIPSE cohort

Bartolome Celli <sup>1,15</sup>, Nicholas Locantore <sup>2,15</sup>, Julie C. Yates<sup>3</sup>, Per Bakke<sup>4</sup>, Peter M.A. Calverley<sup>5</sup>, Courtney Crim<sup>3</sup>, Harvey O. Coxson<sup>6</sup>, David A. Lomas<sup>7</sup>, William MacNee<sup>8</sup>, Bruce E. Miller<sup>2</sup>, Hana Mullerova<sup>2</sup>, Stephen I. Rennard <sup>9</sup>, Edwin K. Silverman<sup>1</sup>, Emiel Wouters<sup>10,11</sup>, Ruth Tal-Singer <sup>2</sup>, Alvar Agusti<sup>12,13,16</sup> and Jørgen Vestbo <sup>14,16</sup>, for the Evaluation of COPD Longitudinally to Identify Predictive Surrogate Endpoints (ECLIPSE) Investigators

**Affiliations:** <sup>1</sup>Brigham and Women's Hospital, Harvard Medical School, Boston, MA, USA. <sup>2</sup>GSK R&D, Collegeville, PA, USA. <sup>3</sup>GSK R&D, Research Triangle Park, NC, USA. <sup>4</sup>Institute of Internal Medicine, University of Bergen, Bergen, Norway. <sup>5</sup>Institute of Ageing and Chronic Disease, University of Liverpool, Liverpool, UK. <sup>6</sup>Centre for Heart Lung Innovation, St Paul's Hospital, Vancouver, BC, Canada. <sup>7</sup>UCL Respiratory, Rayne Institute, University College London, London, UK. <sup>8</sup>University of Edinburgh, Edinburgh, UK. <sup>9</sup>University of Nebraska Medical Center, Omaha, NE, USA. <sup>10</sup>University of Maastricht, Maastricht, The Netherlands. <sup>11</sup>Ludwig Boltzmann Institute for Lung Health, Vienna, Austria. <sup>12</sup>Respiratory Institute, Hospital Clinic, IDIBAPS, University of Barcelona, Barcelona, Spain. <sup>13</sup>CIBER Enfermedades Respiratorias (CIBERES), Madrid, Spain. <sup>14</sup>Division of Infection, Immunity and Respiratory Medicine, School of Biological Sciences, University of Manchester, Manchester, UK. <sup>15</sup>Joint first authors. <sup>16</sup>Joint senior authors.

**Correspondence:** Bartolome Celli, Brigham and Women's Hospital and Harvard Medical School, 31 Riverglenn Rd, Wellesley, MA 02481-1626, USA. E-mail: BCelli@copdnet.org

@ERSpublications

**In patients with COPD, 1- and 3-year changes in exacerbation frequency, systemic inflammation, BODE and SGRQ scores, and FEV<sub>1</sub> decline, are independent markers of disease activity associated with 8-year all-cause mortality** <https://bit.ly/2CyifcN>

**Cite this article as:** Celli B, Locantore N, Yates JC, *et al.* Markers of disease activity in COPD: an 8-year mortality study in the ECLIPSE cohort. *Eur Respir J* 2021; 57: 2001339 [https://doi.org/10.1183/13993003.01339-2020].

This single-page version can be shared freely online.

## ABSTRACT

**Rationale:** There are no validated measures of disease activity in COPD. Since “active” disease is expected to have worse outcomes (*e.g.* mortality), we explored potential markers of disease activity in patients enrolled in the ECLIPSE cohort in relation to 8-year all-cause mortality.

**Methods:** We investigated 1) how changes in relevant clinical variables over time (1 or 3 years) relate to 8-year mortality; 2) whether these variables inter-relate; and 3) if any clinical, imaging and/or biological marker measured cross-sectionally at baseline relates to any activity component.

**Results:** Results showed that 1) after 1 year, hospitalisation for COPD, exacerbation frequency, worsening of body mass index, airflow obstruction, dyspnoea and exercise (BODE) index or health status (St George's Respiratory Questionnaire (SGRQ)) and persistence of systemic inflammation were significantly associated with 8-year mortality; 2) at 3 years, the same markers, plus forced expiratory volume in 1 s (FEV<sub>1</sub>) decline and to a lesser degree computed tomography (CT) emphysema, showed association, thus qualifying as markers of disease activity; 3) changes in FEV<sub>1</sub>, inflammatory cytokines and CT emphysema were not

inter-related, while the multidimensional indices (BODE and SGRQ) showed modest correlations; and 4) changes in these markers could not be predicted by any baseline cross-sectional measure.

**Conclusions:** In COPD, 1- and 3-year changes in exacerbation frequency, systemic inflammation, BODE and SGRQ scores and FEV<sub>1</sub> decline are independent markers of disease activity associated with 8-year all-cause mortality. These disease activity markers are generally independent and not predictable from baseline measurements.
