# Supplementary material for: Markers of disease activity in COPD: an 8-year mortality study in the ECLIPSE cohort
Source: PubMed Central journal article supplement — Eur Respir J. 2021 Mar 25;57(3):2001339. doi: 10.1183/13993003.01339-2020 (PMC7991608; doi:10.1183/13993003.01339-2020), 2021-03-25
Supplement: ERJ-01339-2020.SUPPLEMENT.pdf [file ERJ-01339-2020.SUPPLEMENT.pdf]

**TABLE E1** Baseline demographic and clinical characteristics of participants who consented versus did not consent to participate in the 8-year follow-up

| Parameter                                                | Not Consented for 8-year follow-up |                                        | Consented for 8-year follow-up<br>(N=1555) | p-value** |
|----------------------------------------------------------|------------------------------------|----------------------------------------|--------------------------------------------|-----------|
|                                                          | Died by Year 3<br>(N=211)          | Alive or LTFU* at<br>Year 3<br>(N=398) |                                            |           |
| <b>Baseline Demographic and Clinical Characteristics</b> |                                    |                                        |                                            |           |
| Mean (SD) age, y                                         | 66 (6)                             | 63 (7)                                 | 63 (7)                                     | 0.968     |
| Male, %                                                  | 70                                 | 66                                     | 64                                         | 0.451     |
| Mean (SD) post-BD FEV <sub>1</sub> , L                   | 1.11 (0.47)                        | 1.28 (0.49)                            | 1.40 (0.52)                                | <0.001    |
| Mean (SD) post-BD FEV <sub>1</sub> , % predicted         | 41 (15)                            | 46 (16)                                | 50 (16)                                    | <0.001    |
| FEV <sub>1</sub> /FVC ratio                              | 0.42 (0.12)                        | 0.45 (0.12)                            | 0.45 (0.11)                                | 0.774     |
| GOLD II/III/IV, %                                        | 27/47/26                           | 40/43/17                               | 48/41/11                                   | <0.001    |
| GOLD 2017 A/B/C/D, %                                     | 10/12/21/58                        | 14/15/22/49                            | 26/12/25/36                                | <0.001    |
| Mean (SD) 6MWD, m                                        | 303 (126)                          | 318 (109)                              | 391 (117)                                  | <0.001    |
| Mean (SD) Emphysema, PD15 <sup>†</sup> , g/L             | 46 (26)                            | 49 (27)                                | 53 (26)                                    | 0.016     |

|                                                                  |           |             |             |        |
|------------------------------------------------------------------|-----------|-------------|-------------|--------|
| Mean (SD) BODE index                                             | 4.4 (2.3) | 3.8 (2.1)   | 2.8 (2.0)   | <0.001 |
| Mean (SD) SGRQ total score                                       | 54 (18)   | 54 (17)     | 46 (18)     | <0.001 |
| COPD hospitalisation history, %                                  | 28        | 12          | 14          | 0.376  |
| Frequent exacerbation history, %                                 | 27        | 24          | 20          | 0.097  |
| Cardiovascular history, %                                        | 46        | 30          | 32          | 0.457  |
| Depression symptoms, %                                           | 32        | 37          | 23          | <0.001 |
| Asthma history, %                                                | 24        | 23          | 23          | 0.970  |
| Diabetes history, %                                              | 17        | 7           | 10          | 0.073  |
| <b>Clinical Characteristics at Year 3</b>                        |           |             |             |        |
| Mean (SD) post-BD FEV <sub>1</sub> , L                           | n/a       | 1.20 (0.50) | 1.33 (0.54) | 0.001  |
| Mean (SD) post-BD FEV <sub>1</sub> , % predicted                 | n/a       | 44 (16)     | 47 (16)     | 0.007  |
| Mean (SD) FEV <sub>1</sub> decline during main study,<br>(mL/yr) | n/a       | 35 (44)     | 26 (40)     | <0.001 |
| Mean (SD) 6MWD, m                                                | n/a       | 308 (131)   | 384 (128)   | <0.001 |
| Mean (SD) Emphysema, PD15 <sup>¶</sup> , g/L                     | n/a       | 45 (25)     | 51 (28)     | 0.006  |
| Mean (SD) BODE index                                             | n/a       | 4.0 (2.3)   | 3.1 (2.2)   | <0.001 |

|                                                          |     |         |         |        |
|----------------------------------------------------------|-----|---------|---------|--------|
| Mean (SD) SGRQ total score                               | n/a | 54 (18) | 46 (19) | <0.001 |
| COPD hospitalisation during main study, %                | n/a | 24      | 31      | 0.003  |
| Frequent exacerbations (FE) all 3 years of main study, % | n/a | 17      | 12      | 0.015  |

\*LTFU (lost to follow-up) includes 19 who were lost during the main study plus the 379 who did not consent for participation in the 8-year follow-up after Year 3.

\*\*Comparison between consented participants and non-consented participants who were not confirmed to have died by Year 3.

†PD15: lowest 15<sup>th</sup> percentile of lung density.

6MWD: 6-minute walk distance; BD: bronchodilator; BODE: body mass index, obstruction, dyspnoea, and exercise; COPD: chronic obstructive pulmonary disease; FEV<sub>1</sub>: forced expiratory volume in 1 second; FVC: forced vital capacity; GOLD: Global Initiative for Chronic Obstructive Lung Disease; SD: standard deviation; SGRQ: St. George's Respiratory Questionnaire.

**TABLE E2** Correlations (Spearman’s Rho) between disease activity markers and baseline measurements

| Variable description         | 1yr<br>chg,<br>FEV <sub>1</sub> | FEV <sub>1</sub><br>decline,<br>3yr | 1yr<br>chg,<br>PD15 | PD15<br>decline,<br>3yr | 1yr<br>chg,<br>BODE | 3yr<br>chg,<br>BODE | COPD<br>Hosp,<br>Year 1 | COPD<br>Hosp,<br>3<br>Years | Freq<br>Exbs,<br>Year 1 | 1yr<br>chg,<br>SGRQ | 3yr<br>chg,<br>SGRQ | Systemic<br>Inflamm.<br>Markers |
|------------------------------|---------------------------------|-------------------------------------|---------------------|-------------------------|---------------------|---------------------|-------------------------|-----------------------------|-------------------------|---------------------|---------------------|---------------------------------|
| <b>BASELINE DEMOGRAPHICS</b> |                                 |                                     |                     |                         |                     |                     |                         |                             |                         |                     |                     |                                 |
| Age                          | 0.01                            | 0.05                                | 0.07                | 0.07                    | -0.02               | 0.06                | 0.06                    | 0.08                        | 0.02                    | 0.06                | 0.08                | 0.04                            |
| Sex (+ Female; – Male)       | 0.02                            | 0.05                                | -0.04               | -0.25                   | -0.02               | -0.01               | -0.03                   | -0.01                       | 0.09                    | -0.01               | 0.02                | -0.04                           |
| Weight                       | 0.03                            | 0.02                                | 0.07                | 0.48                    | -0.04               | -0.10               | -0.07                   | -0.10                       | -0.08                   | 0.01                | -0.07               | 0.12                            |
| Body Mass Index              | 0.04                            | 0.06                                | 0.08                | 0.47                    | -0.05               | -0.11               | -0.06                   | -0.07                       | -0.02                   | 0.00                | -0.07               | 0.14                            |
| Fat free mass                | 0.01                            | -0.01                               | 0.05                | 0.41                    | 0.00                | -0.08               | -0.06                   | -0.10                       | -0.12                   | 0.01                | -0.07               | 0.04                            |
| Fat free mass index          | 0.02                            | 0.04                                | 0.06                | 0.44                    | 0.00                | -0.07               | -0.04                   | -0.06                       | -0.08                   | 0.01                | -0.06               | 0.11                            |
| Percent body fat             | 0.06                            | 0.06                                | 0.01                | 0.05                    | -0.08               | -0.05               | 0.00                    | 0.02                        | 0.10                    | -0.03               | -0.02               | 0.10                            |
| Pack-year history            | -0.06                           | -0.08                               | 0.04                | 0.07                    | -0.01               | 0.05                | 0.03                    | 0.02                        | -0.02                   | 0.02                | 0.03                | 0.13                            |
| Current smoker               | -0.01                           | -0.11                               | -0.04               | -0.25                   | 0.02                | 0.03                | -0.03                   | -0.01                       | -0.02                   | 0.01                | 0.03                | 0.08                            |
| <b>BASELINE SYMPTOMS</b>     |                                 |                                     |                     |                         |                     |                     |                         |                             |                         |                     |                     |                                 |
| Chronic bronchitis           | 0.02                            | -0.02                               | -0.04               | -0.03                   | -0.01               | -0.03               | 0.02                    | 0.03                        | 0.00                    | -0.07               | -0.10               | 0.07                            |

|                                 |       |       |  |       |       |  |       |       |  |       |       |       |  |       |       |  |       |
|---------------------------------|-------|-------|--|-------|-------|--|-------|-------|--|-------|-------|-------|--|-------|-------|--|-------|
| Chronic cough                   | -0.01 | -0.05 |  | -0.07 | -0.08 |  | -0.02 | 0.04  |  | 0.08  | 0.10  | 0.08  |  | -0.07 | -0.06 |  | 0.16  |
| MMRC dyspnoea                   | -0.02 | -0.03 |  | -0.03 | 0.03  |  | -0.28 | -0.13 |  | 0.23  | 0.26  | 0.19  |  | -0.08 | -0.04 |  | 0.23  |
| SGRQ Total score                | 0.00  | -0.04 |  | -0.08 | -0.01 |  | -0.03 | 0.04  |  | 0.28  | 0.30  | 0.26  |  | -0.24 | -0.24 |  | 0.24  |
| <b>COMORBIDITIES</b>            |       |       |  |       |       |  |       |       |  |       |       |       |  |       |       |  |       |
| CV history (incl. hypertension) | 0.07  | 0.03  |  | 0.02  | 0.10  |  | -0.07 | -0.01 |  | 0.00  | -0.02 | -0.03 |  | -0.02 | 0.00  |  | 0.11  |
| CV history (excl. hypertension) | 0.02  | 0.01  |  | 0.00  | 0.09  |  | -0.07 | -0.01 |  | 0.03  | 0.05  | 0.01  |  | -0.02 | -0.06 |  | 0.09  |
| Diastolic blood pressure        | -0.01 | 0.00  |  | -0.01 | 0.05  |  | 0.01  | 0.00  |  | 0.03  | 0.00  | 0.00  |  | 0.02  | 0.01  |  | -0.03 |
| Systolic blood pressure         | 0.03  | 0.05  |  | 0.00  | 0.04  |  | -0.04 | 0.00  |  | 0.01  | -0.04 | -0.01 |  | -0.03 | 0.00  |  | 0.00  |
| Depression score                | -0.02 | -0.03 |  | -0.01 | -0.02 |  | 0.01  | 0.00  |  | 0.12  | 0.11  | 0.17  |  | -0.08 | -0.08 |  | 0.15  |
| FACIT Fatigue score             | 0.01  | 0.02  |  | 0.06  | 0.01  |  | 0.02  | -0.01 |  | -0.21 | -0.17 | -0.19 |  | 0.07  | 0.12  |  | -0.19 |
| <b>BASELINE LUNG FUNCTION</b>   |       |       |  |       |       |  |       |       |  |       |       |       |  |       |       |  |       |
| FEV <sub>1</sub>                | -0.13 | -0.10 |  | 0.08  | 0.15  |  | 0.03  | -0.04 |  | -0.24 | -0.29 | -0.27 |  | -0.01 | -0.09 |  | -0.14 |
| FEV <sub>1</sub> %predicted     | -0.14 | -0.07 |  | 0.09  | 0.05  |  | 0.04  | -0.01 |  | -0.24 | -0.27 | -0.22 |  | -0.01 | -0.07 |  | -0.15 |
| FEV <sub>1</sub> reversibility  | -0.18 | -0.12 |  | 0.01  | 0.01  |  | 0.02  | 0.00  |  | -0.06 | -0.01 | -0.05 |  | -0.03 | -0.03 |  | -0.01 |
| FEV <sub>1</sub> /FVC ratio     | -0.01 | 0.06  |  | 0.09  | 0.10  |  | 0.00  | -0.08 |  | -0.17 | -0.23 | -0.17 |  | -0.03 | -0.14 |  | -0.07 |
| Inspiratory capacity            | 0.00  | -0.15 |  | 0.01  | 0.18  |  | 0.01  | -0.08 |  | -0.16 | -0.13 | -0.19 |  | 0.01  | -0.10 |  | -0.12 |
| Functional Residual Capacity    | -0.05 | -0.19 |  | -0.01 | -0.08 |  | 0.07  | 0.22  |  | 0.17  | 0.25  | 0.06  |  | 0.05  | 0.08  |  | 0.04  |

|                                      |       |       |  |       |       |  |       |       |  |       |       |       |  |       |       |  |       |
|--------------------------------------|-------|-------|--|-------|-------|--|-------|-------|--|-------|-------|-------|--|-------|-------|--|-------|
| Residual volume                      | -0.03 | -0.12 |  | -0.02 | -0.09 |  | 0.09  | 0.20  |  | 0.21  | 0.27  | 0.15  |  | 0.07  | 0.09  |  | 0.12  |
| Total lung capacity                  | -0.05 | -0.23 |  | -0.01 | 0.03  |  | 0.06  | 0.13  |  | 0.10  | 0.15  | -0.03 |  | 0.06  | 0.01  |  | -0.03 |
| Blood oxygen level                   | -0.01 | 0.03  |  | 0.03  | 0.00  |  | 0.01  | -0.01 |  | -0.19 | -0.19 | -0.12 |  | 0.01  | -0.04 |  | -0.13 |
| 6-minute walk distance               | -0.02 | -0.02 |  | 0.07  | -0.05 |  | 0.13  | 0.05  |  | -0.15 | -0.18 | -0.13 |  | -0.04 | 0.01  |  | -0.24 |
| BODE Index                           | 0.05  | 0.00  |  | -0.08 | -0.04 |  | -0.25 | -0.13 |  | 0.27  | 0.33  | 0.23  |  | 0.01  | 0.06  |  | 0.24  |
| <b>BASELINE IMAGING</b>              |       |       |  |       |       |  |       |       |  |       |       |       |  |       |       |  |       |
| Emphysema (PD15)                     | 0.06  | 0.10  |  | -0.17 | -0.11 |  | -0.07 | -0.14 |  | -0.12 | -0.17 | -0.12 |  | -0.07 | -0.13 |  | -0.02 |
| <b>EXACERBATION HISTORY</b>          |       |       |  |       |       |  |       |       |  |       |       |       |  |       |       |  |       |
| Exacerbations, year prior to study   | -0.01 | -0.01 |  | 0.01  | -0.02 |  | 0.00  | 0.03  |  | 0.23  | 0.24  | 0.37  |  | 0.00  | 0.02  |  | 0.10  |
| COPD Hosp, year prior to study       | 0.00  | -0.03 |  | -0.07 | -0.04 |  | 0.02  | 0.05  |  | 0.30  | 0.29  | 0.19  |  | 0.01  | 0.03  |  | 0.09  |
| <b>BASELINE INFLAMMATORY MARKERS</b> |       |       |  |       |       |  |       |       |  |       |       |       |  |       |       |  |       |
| White blood count                    | 0.02  | -0.03 |  | -0.04 | -0.03 |  | -0.04 | 0.00  |  | 0.08  | 0.08  | 0.09  |  | -0.04 | 0.01  |  | 0.49  |
| Neutrophil count                     | 0.01  | -0.05 |  | -0.03 | -0.01 |  | -0.04 | 0.04  |  | 0.10  | 0.11  | 0.10  |  | -0.03 | 0.02  |  | 0.50  |
| Eosinophil count                     | 0.01  | 0.03  |  | 0.03  | 0.04  |  | -0.02 | -0.06 |  | -0.01 | -0.03 | 0.05  |  | 0.00  | 0.02  |  | 0.08  |
| High sensitivity CRP                 | -0.04 | -0.01 |  | 0.01  | 0.13  |  | -0.03 | 0.01  |  | 0.12  | 0.12  | 0.10  |  | -0.02 | -0.02 |  | 0.53  |
| IL-6                                 | -0.02 | 0.03  |  | 0.01  | 0.10  |  | -0.04 | -0.02 |  | 0.03  | 0.03  | 0.01  |  | -0.04 | -0.01 |  | 0.21  |

|            |       |       |  |       |       |  |       |      |  |      |      |       |  |       |       |  |      |
|------------|-------|-------|--|-------|-------|--|-------|------|--|------|------|-------|--|-------|-------|--|------|
| IL-8       | -0.06 | -0.02 |  | 0.01  | -0.04 |  | -0.01 | 0.01 |  | 0.02 | 0.05 | 0.01  |  | -0.05 | -0.02 |  | 0.06 |
| Fibrinogen | -0.01 | -0.02 |  | 0.06  | 0.10  |  | 0.00  | 0.05 |  | 0.10 | 0.10 | 0.12  |  | 0.02  | 0.01  |  | 0.49 |
| SP-D       | 0.01  | -0.04 |  | -0.10 | -0.11 |  | -0.01 | 0.02 |  | 0.03 | 0.05 | -0.01 |  | -0.02 | 0.00  |  | 0.00 |
| CC-16      | 0.00  | 0.05  |  | 0.00  | 0.08  |  | -0.03 | 0.02 |  | 0.05 | 0.06 | 0.02  |  | 0.02  | 0.01  |  | 0.02 |
| CCL-18     | -0.01 | -0.03 |  | 0.02  | 0.16  |  | 0.00  | 0.02 |  | 0.08 | 0.09 | 0.09  |  | 0.01  | 0.01  |  | 0.25 |

BODE: body mass index, obstruction, dyspnea, and exercise; CC-16: club cell protein 16; CCL-18: chemokine (C-C motif) ligand 18;

CRP: C-reactive protein; COPD: chronic obstructive pulmonary disease; CV: cardiovascular; FACIT: Functional Assessment of

Chronic Illness Therapy; FEV<sub>1</sub>: forced expiratory volume in 1 second; FVC: forced vital capacity; IL-6: interleukin-6; IL-8:

interleukin-8; MMRC: modified Medical Research Council; PD15: lowest 15<sup>th</sup> percentile density method; SGRQ: St. George's

Respiratory Questionnaire; SP-D: surfactant protein-D;

Yr: year.
